# Supplementary material for: Thermodynamically stable MOF showing a highly rare four-connected hxg-d-4-Cccm net with self-penetration, polyrotaxane, and polycatenane multi-features
Source: Royal Society of Chemistry journal article supplement (doi:10.1039/c5ce02413g), 2016-01-01
Supplement: c5ce02413g1.pdf [file c5ce02413g1.pdf]

## Electronic Supporting Information

### Thermodynamically stable MOF showing highly rare four-connected *hxx-d-4-Cccm* net with self-penetration, polyrotaxane, and polycatenane multi-features

Le Zhang,<sup>a</sup> Xue Feng Feng,<sup>b\*</sup> Pan Pan Meng,<sup>a</sup> Le Le Gong,<sup>a</sup> and Feng Luo<sup>ab\*</sup>

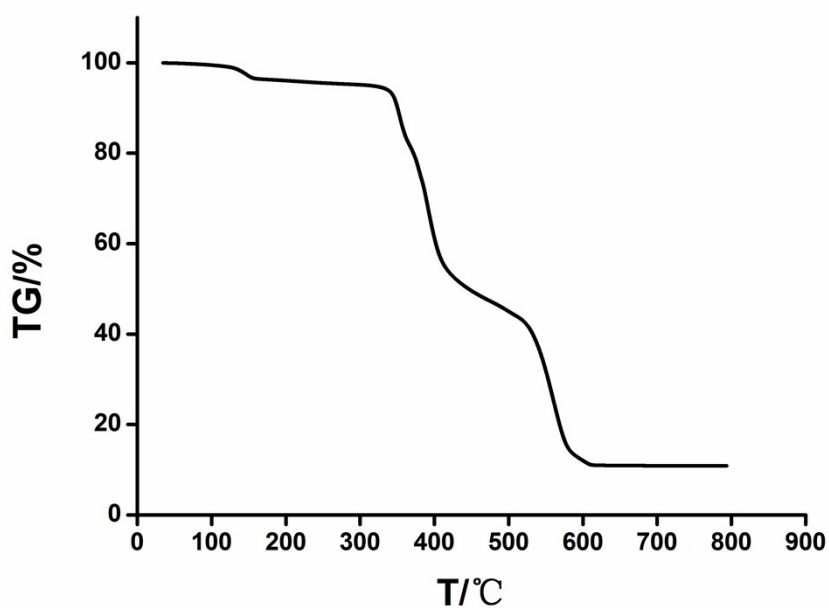

Fig. S1. The TG studies of 1.

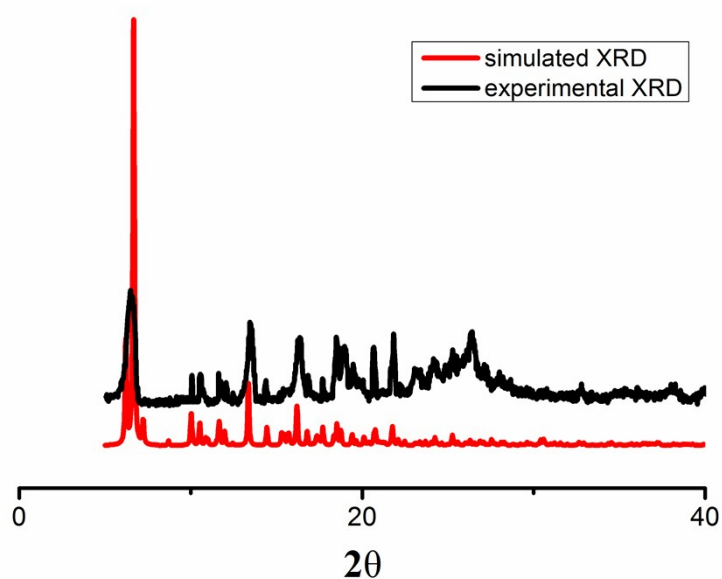

Fig. S2. The simulated PXRD pattern from single crystal data and the experimental PXRD pattern from the crystal samples.
